# Supplementary material for: Reversible uptake and release of sodium ions in layered SnS2-reduced graphene oxide composites for neuromorphic devices
Source: Royal Society of Chemistry journal article supplement (doi:10.1039/c9nr03073e), 2019-01-01
Supplement: c9nr03073e1.pdf [file c9nr03073e1.pdf]

## Supplementary Information

### **Reversible uptake and release of sodium ions in layered SnS<sub>2</sub>-reduced graphene oxide composites for neuromorphic devices**

Eun-Kyeong Jang, Youngjun Park, and Jang-Sik Lee\*

Department of Materials Science and Engineering, Pohang University of Science and Technology (POSTECH), Pohang 37673, Korea

\*E-mail address: jangsik@postech.ac.kr

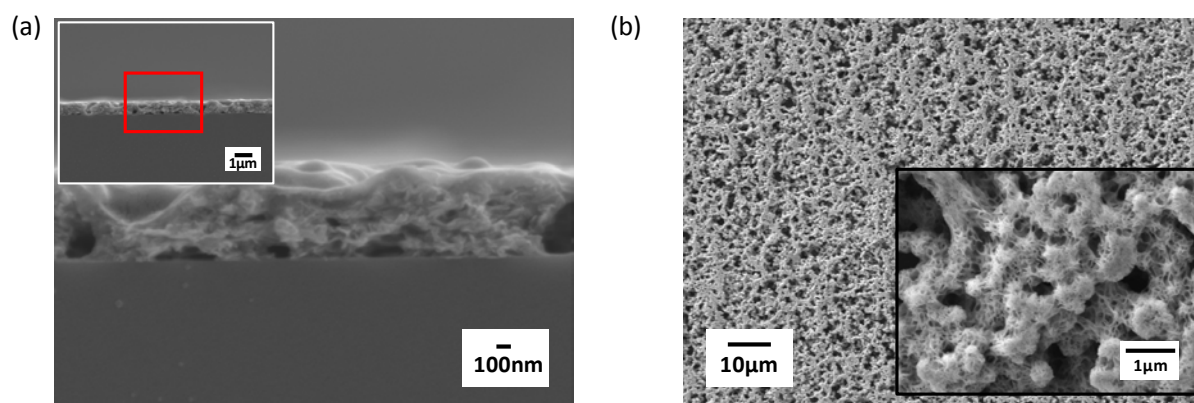

**Figure S1.** (a) Cross-sectional SEM images of the SnS<sub>2</sub>-RGO/nafion film. (b) Top-view SEM images of the SnS<sub>2</sub>-RGO.

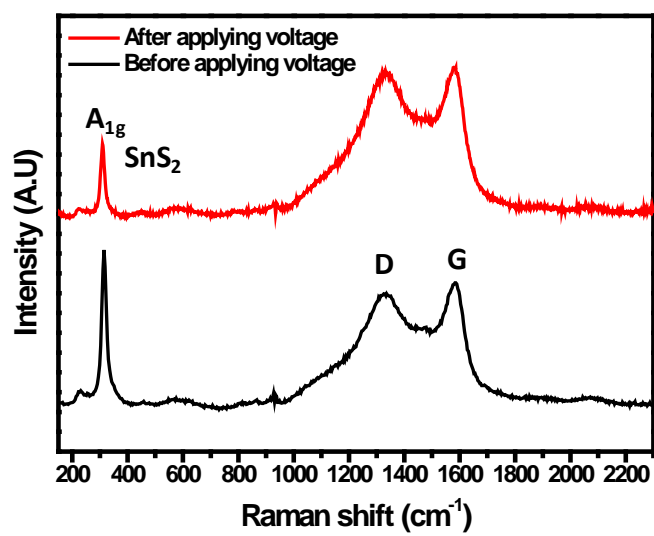

**Figure S2.** Raman spectra of the SnS<sub>2</sub>-RGO sample before applying gate voltage (black) and after applying gate voltage (red).

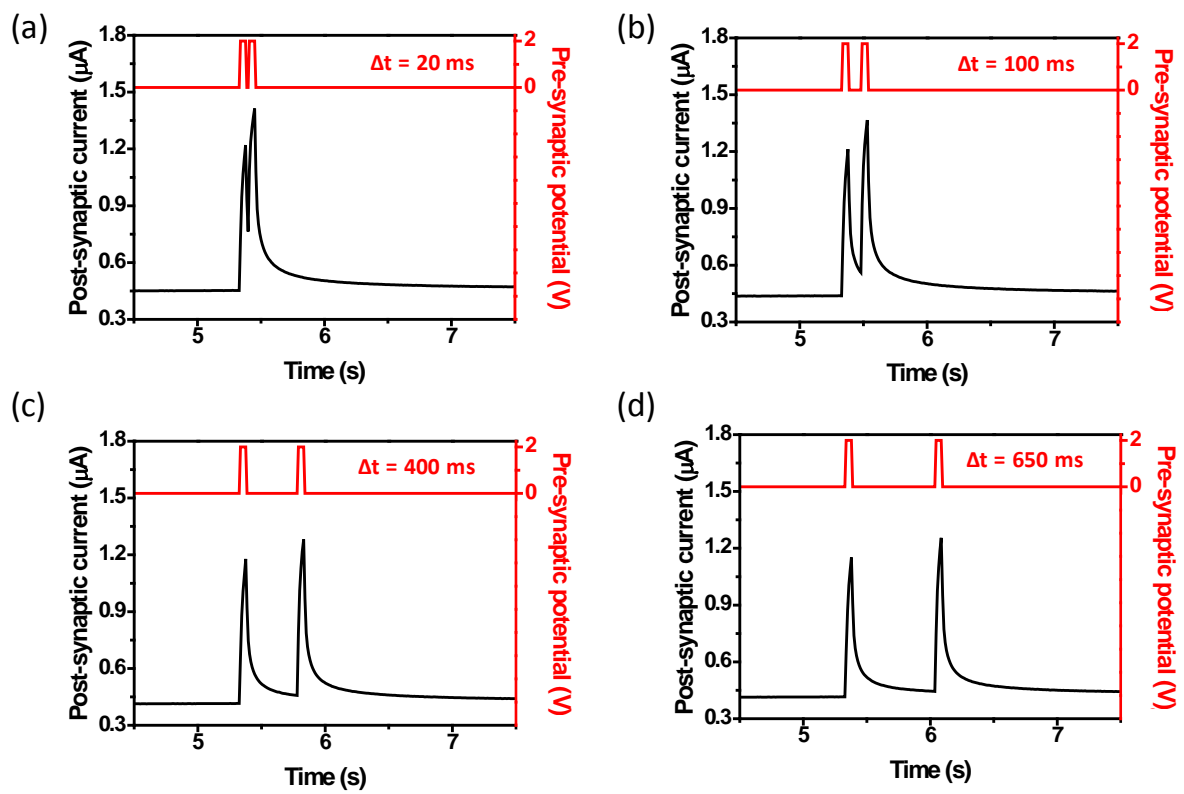

**Figure S3.** EPSC by a pair of consecutive voltage pulses (2 V, 50 ms) with pulse intervals of (a) 20 ms, (b) 100 ms, (c) 400 ms, and (d) 650 ms.

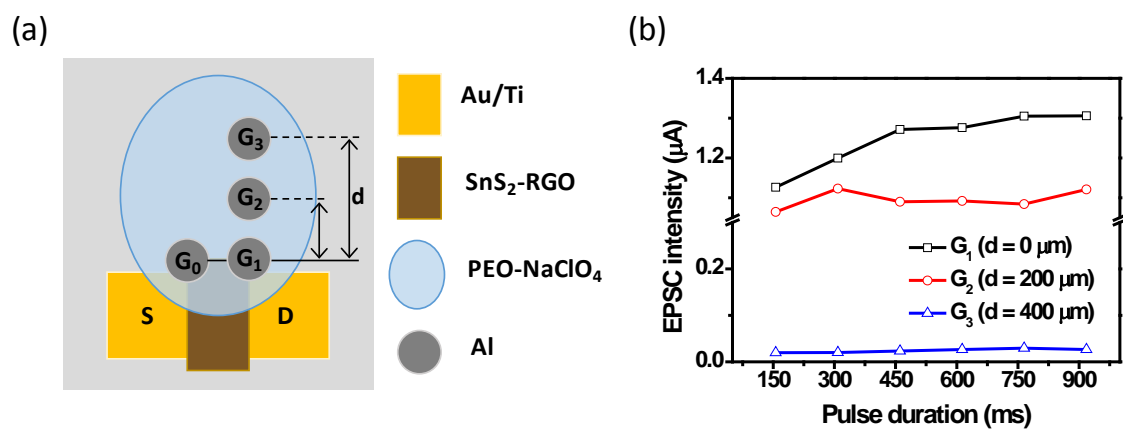

**Figure S4.** (a) Schematic image of artificial synapse with multi-gate synaptic inputs. (b) Spatiotemporal EPSC intensity with pulse duration at different channel-to-gate lateral distance  $d$ .

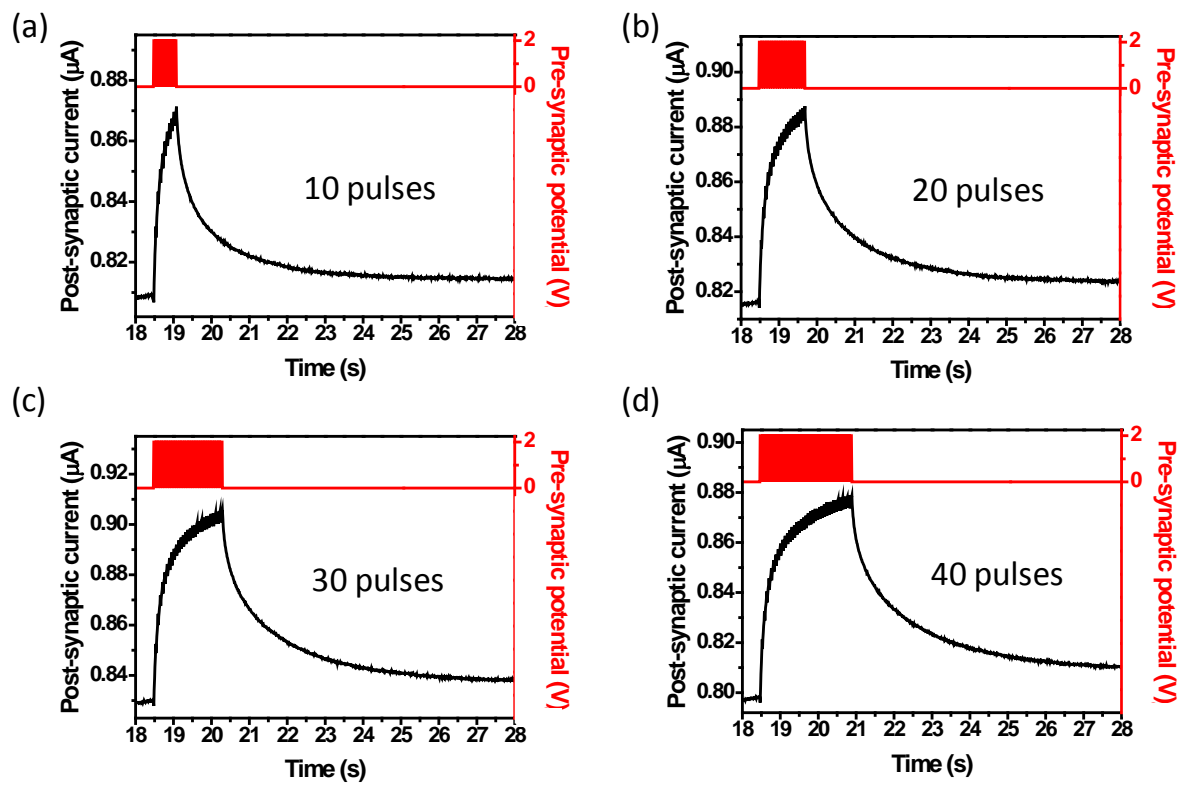

**Figure S5.** Transition from short-term to long-term memory with identical consecutive voltage pulses (2 V, 50 ms) and different pulse numbers of (a)  $N=10$ , (b)  $N=20$ , (c)  $N=30$ , and (d)  $N=40$ .

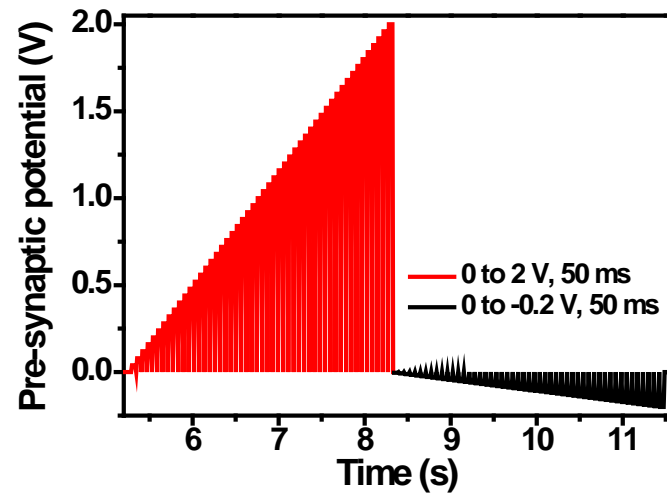

**Figure S6.** Pre-synaptic potential pulses. Positive voltage pulses were applied sequentially from 0 V to 2 V in 50 ms to measure the potentiation and negative voltage pulses were applied sequentially from 0 V to -0.2 V in 50 ms to measure the depression.

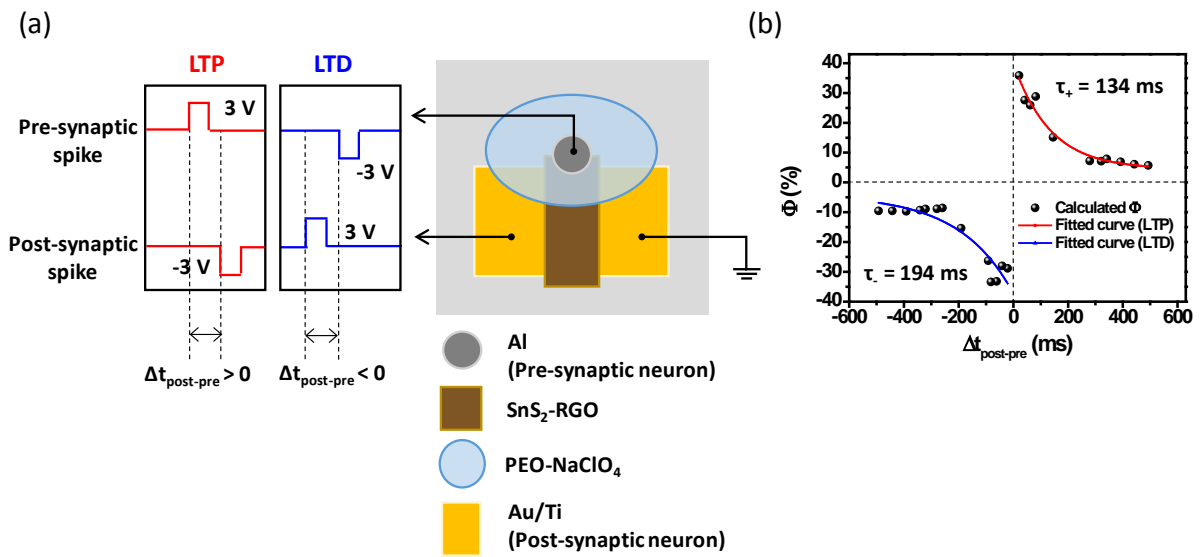

**Figure S7.** (a) Schematic image and pulse design for testing STDP behaviors. (b)  $\Phi$  as a function of  $\Delta t_{\text{post-pre}}$  ( $\Phi = (W_{\text{STDP}} - W_0)/W_0$ ) and fitted curves of LTP/LTD with STDP functions,  $\Phi (\Delta t_{\text{post-pre}} > 0) = A_+ \cdot \exp(-\Delta t_{\text{post-pre}}/\tau_+)$  and  $\Phi (\Delta t_{\text{post-pre}} < 0) = A_- \cdot \exp(-\Delta t_{\text{post-pre}}/\tau_-)$ . The  $A_+$  and  $A_-$  are amplitudes of LTP and LTD parts in the graph; the  $\tau_+$  and  $\tau_-$  are time constants of LTP and LTD.<sup>60,61</sup>
